# Supplementary material
Source: publisher site journal article supplement (https://www.spandidos-publications.com/833/downloadSupplementary)
Supplement: Supplementary file 1 [file downloadSupplementary]

Table SI. Primers used for confirmation of the results of 2-D electrophoresis, and high-throughput sequencing.

| A, 2-D electrophoresis                                      |                                                     |                                                   |
|-------------------------------------------------------------|-----------------------------------------------------|---------------------------------------------------|
| Protein/gene                                                | Forward primer                                      | Reverse primer                                    |
| 16S rRNA                                                    | 5'-TTACCAGCCCTTGACATCC-3'                           | 5'AACCCAACATCTCACGACAC-3'                         |
| Hypothetical protein BAbS19_I16470                          | 5'-GGTGTCCAGGATTGTTTCG-3'                           | 5'-TGTCTGTCGGCGTTTCAT-3'                          |
| ExsB protein                                                | 5'-TATCGCACGCCCTTTGAG-3'                            | 5'-TGGTCGGGTCGTCTATTCC-3'                         |
| Enoyl-(acyl carrier protein) reductase                      | 5'-TAATCGCTCTATCGCTTGGG-3'                          | 5'-CTTCTTCAATGCGTCACCCT-3'                        |
| Chaperonin Cpn60TCP-1                                       | 5'-ACGAAGTAAGGCGACAGG-3'                            | 5'-TTGAAGAAGCCAAGACCG-3'                          |
| Aspartate-semialdehyde dehydrogenase                        | 5'-TAATCGCCAACCCGAAGT-3'                            | 5'-CCGACTGATAGGTGGAAACA-3'                        |
| Elongation factor Tu                                        | 5'-AGCAGCCGAAACCACCA-3'                             | 5'-AGACCGCAAACCGTCACTA-3'                         |
| Polyprenyl synthetase                                       | 5'-TGCTGGGTCAGGCGTTCAA-3'                           | 5'-ATTCTGCTTCGGTGGTTTCC-3'                        |
| Putative sulfite oxidase subunit YedY                       | 5'-CAAGCCTTCTGTCGCAA-3'                             | 5'-CTCATCAAGACGCAAACCC-3'                         |
| DnaJ, chaperone protein DnaJ                                | 5'-CGAAGCCGAACGCAA-3'                               | 5'-CGCCATAACCGCCATTTT-3'                          |
| isocitrate dehydrogenase                                    | 5'-CCACTATCGCCAGCATCA-3'                            | 5'-ACCTTTTCCAGCGTTTCG-3'                          |
| Enolase                                                     | 5'-ACGCAGACGAGCCGAAT-3'                             | 5'-GCTTGCCAGCGACTATCCTA-3'                        |
| Acetyl-CoA carboxylase, $\alpha$ subunit                    | 5'-GCCCTTCAGGCTGGTTT-3'                             | 5'-TTGAGGCGGGTCTTGGTGT-3'                         |
| Bacterial protein export chaperone SecB                     | 5'-CTTGGCTTCCAGCGTCA-3'                             | 5'-GCGCCTTCCATCAACATC-3'                          |
| Antifreeze protein, type I                                  | 5'-CATCTGGCTGGCATGAAGG-3'                           | 5'-TCAGGCAGAACGGTGAAGAG-3'                        |
| Lactatemale dehydrogenase                                   | 5'-GGTCGGAACGCCACATA<br>CAT-3'                      | 5'-CCAGATGGCTGAATCCTACCTC-3'                      |
| Phosphoribosylformylglycinamidinecyclo-<br>ligase           | 5'-AGGAAGCAAGGCCAGAAT-3'                            | 5'-GGTGAGACGGCGGAAAT-3'                           |
| Periplasmic binding protein<br>tryptophanyl-tRNA synthetase | 5'-CTGGTGAAACCCGCTATCC-3'<br>5'-CCTGGGTGTTCAACTG-3' | 5'-GTGCCTACAACCCTGT-3'<br>5'-AGGCTCGGATAGGCAAA-3' |
| B, High-throughput sequencing                               |                                                     |                                                   |
| Protein/gene                                                | Forward primer                                      | Reverse primer                                    |
| BAbS19_I10210                                               | 5'-GTCAGAACCAACACTGGAG<br>GAT-3'                    | 5'-ATGAAGGTGGCCATAACG-3'                          |
| BAbS19_I13070                                               | 5'-TCGGTTTCGCACTCTTCC-3'                            | 5'-GCCTCATCGCCATTCATC-3'                          |
| BAbS19_I02060                                               | 5'-TTTTGGCGATGACGGTGAC-3'                           | 5'-GGAAACAGGCAGAAAGGGAG-3'                        |
| BAbS19_I03220                                               | 5'-CCTCGCAGACTCCTAAA-3'                             | 5'-ACTGGACGACCAAAGC-3'                            |
| BAbS19_I19140                                               | 5'-AAAACCCTCCCCTTGATAC-3'                           | 5'-TCGATGCGTCGTTCTTG-3'                           |
| BAbS19_I04760                                               | 5'-GCAACGGTCTCCATCATT-3'                            | 5'-GTGCCAGTTTACGA-3'                              |
| BAbS19_I01340                                               | 5'-GCCGATGGCGTAATGAATG-3'                           | 5'-AATGCCGTGCTCCTGTTTGC-3'                        |
| BAbS19_I14970                                               | 5'-ATGGCGTTCAGGACTCACA-3'                           | 5'-TTCCGACCTTCATAGGC-3'                           |
| BAbS19_I01720                                               | 5'-AACTGAAGAAGAACGAG<br>GCG-3'                      | 5'-TGGGCAGGAAGTCACGAAT-3'                         |
| BAbS19_I02050                                               | 5'-TTTTGGCGATGACGGTGAC-3'                           | 5'-GGAAACAGGCAGAAAGGGAG-3'                        |
| BAbS19_I19580                                               | 5'-TTTTGGCGATGACGGTGAC-3'                           | 5'-GGAAACAGGCAGAAAGGGAG-3'                        |
| BAbS19_I17580                                               | 5'-ACCATAGGTTTCACGGCCA<br>TCT-3'                    | 5'-ATCACCGACCCTGCTGCTTCA-3'                       |
| BAbS19_I14530                                               | 5'-GCATACCACGGCAATCTTC-3'                           | 5'-GGCCATTTCAGGTTCTC-3'                           |
| BAbS19_I01700                                               | 5'-ATGGCACGCTGAAGGATTTG-3'                          | 5'-TGCGACGGGAACAGGTTT-3'                          |
| 2-D, two-dimensional.                                       |                                                     |                                                   |
